# Supplementary material for: Revealing the Bacterial Quorum-Sensing Effect on the Biofilm Formation of Diatom Cylindrotheca sp. Using Multimodal Imaging
Source: MDPI journal article supplement (doi:10.3390/microorganisms11071841), 2023-07-20

# Revealing the Bacterial Quorum-Sensing Effect on the Biofilm Formation of Diatom *Cylindrotheca* sp. Using Multimodal Imaging

Cuiyun Yang <sup>1,2,\*</sup>, Guojuan Song <sup>2,†</sup>, Jiyoung Son <sup>3</sup>, Logan Howard <sup>1</sup> and Xiao-Ying Yu <sup>1,\*</sup>

<sup>1</sup> Materials Science and Technology Division, Oak Ridge National Laboratory, Oak Ridge, TN 37830, USA

<sup>2</sup> Laboratory for Marine Ecology and Environmental Science, Qingdao National Laboratory for Marine Science and Technology, Qingdao 266071, China

<sup>3</sup> Energy and Environment Directorate, Pacific Northwest National Laboratory, Richland, WA 99354, USA

\* Correspondence: yangcy29@163.com (C.Y.); yuxiaoying@ornl.gov (X.-Y.Y.); Tel.: +1-865-574-4628 (X.-Y.Y.)

† Current address: College of Chemistry & Chemical Engineering, Yantai University, Yantai 264005, China.

## Supplemental file

Table S1. The f/2 medium components.

| No. | Nutrient elements                                   | Working solution (mg/L) |
|-----|-----------------------------------------------------|-------------------------|
| 1   | NaNO <sub>3</sub>                                   | 75                      |
| 2   | NaH <sub>2</sub> PO <sub>4</sub>                    | 5                       |
| 3   | Na <sub>2</sub> EDTA                                | 20                      |
| 4   | FeCl <sub>3</sub> ·6H <sub>2</sub> O                | 3.16                    |
| 5   | CuSO <sub>4</sub> ·5H <sub>2</sub> O                | 0.01                    |
| 6   | ZnSO <sub>4</sub> ·7H <sub>2</sub> O                | 0.023                   |
| 7   | CoCl <sub>2</sub> ·6H <sub>2</sub> O                | 0.012                   |
| 8   | MnCl <sub>2</sub> ·4H <sub>2</sub> O                | 0.18                    |
| 9   | Na <sub>2</sub> MoO <sub>4</sub> ·2H <sub>2</sub> O | 0.07                    |
| 10  | Thiamine HCl (V <sub>B1</sub> )                     | 0.1 µg                  |
| 11  | Cyanocobalamin (V <sub>B12</sub> )                  | 0.5 µg                  |
| 12  | Biotin                                              | 0.5 µg                  |
| 13  | Filtered seawater                                   | 1000 mL                 |

**Figure S1.** NMR and GC-MS spectra of bacterial quorum sensing signal molecules acyl homoserine lactones (AHLs). The purity of (a) C4-HSL, (b) C8-HSL, and (c) C12-HSL are 95%, 98%, and 100%, respectively.

**a: C4-HSL**

$^1\text{H}$ -NMR (500 MHz,  $\text{CDCl}_3$ )  $\delta_{\text{H}}$ : 0.97 (3H, t,  $J = 7.4$  Hz,  $\text{CH}_3$ ), 1.68 (2H, m,  $\text{CH}_3\text{CH}_2\text{CH}_2\text{CO}$ ), 2.17 (1H, m,  $\text{OCH}_2\text{CH}'\text{HCHNH}$ ), 2.25 (2H, td,  $J = 7.6, 1.3$  Hz,  $\text{CH}_3\text{CH}_2\text{CH}_2\text{CO}$ ), 2.81 (1H, m,  $\text{OCH}_2\text{CH}'\text{HCHNH}$ ), 4.30 (1H, ddd,  $J = 11.2, 9.4, 6.0$  Hz,  $\text{OCH}'\text{HCH}_2\text{CHNH}$ ), 4.47 (1H, td,  $J = 9.0, 0.7$  Hz,  $\text{OCH}'\text{HCH}_2\text{CHNH}$ ), 4.60 (1H, ddd,  $J = 11.5, 8.6, 6.3$  Hz,  $\text{OCH}'\text{HCH}_2\text{CHNH}$ ), 6.34 (1H, s,  $\text{NH}$ );  $^{13}\text{C}$ -NMR (125 MHz,  $\text{CDCl}_3$ )  $\delta_{\text{C}}$ : 13.6 ( $\text{CH}_3$ ), 18.9 ( $\text{CH}_3\text{CH}_2\text{CH}_2\text{CO}$ ), 30.3 ( $\text{OCH}_2\text{CH}_2\text{CHNH}$ ), 38.0 ( $\text{CH}_3\text{CH}_2\text{CH}_2\text{CO}$ ), 49.1 ( $\text{OCH}_2\text{CH}_2\text{CHNH}$ ), 66.1 ( $\text{OCH}_2\text{CH}_2\text{CHNH}$ ), 173.6 ( $\text{C=O}$  amide), 175.7 ( $\text{C=O}$  lactone); MS(EI):  $m/z$  172, 143, 125, 101, 85, 83, 56.

(1) NMR spectra

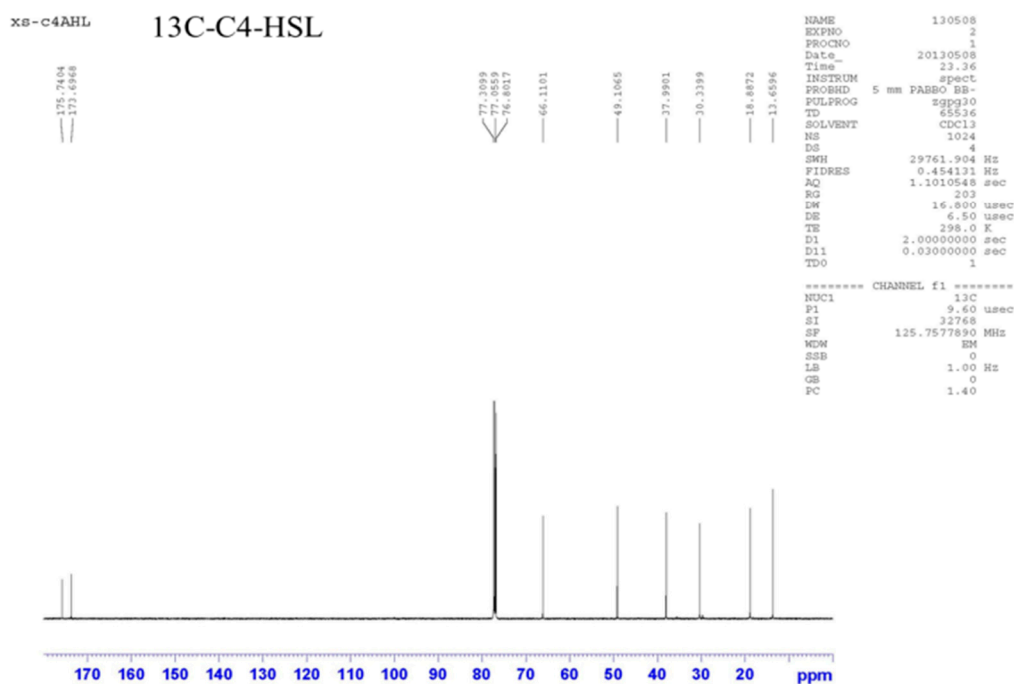

XS-C4AHL

# 1H-C4-HSL

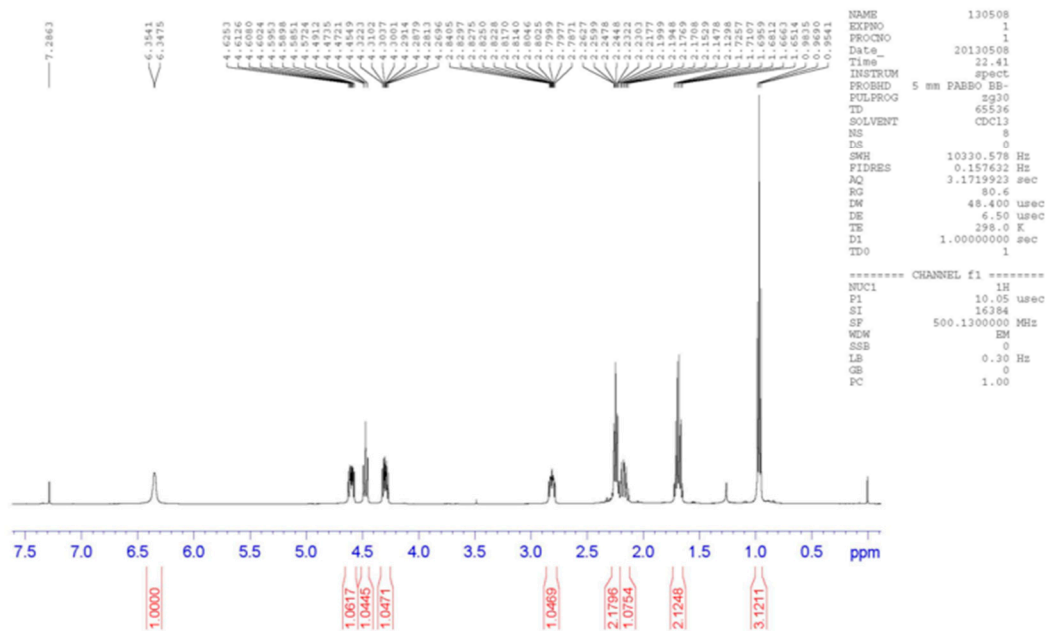

## (2) GC-MS spectra

RT: 0.00 - 24.70

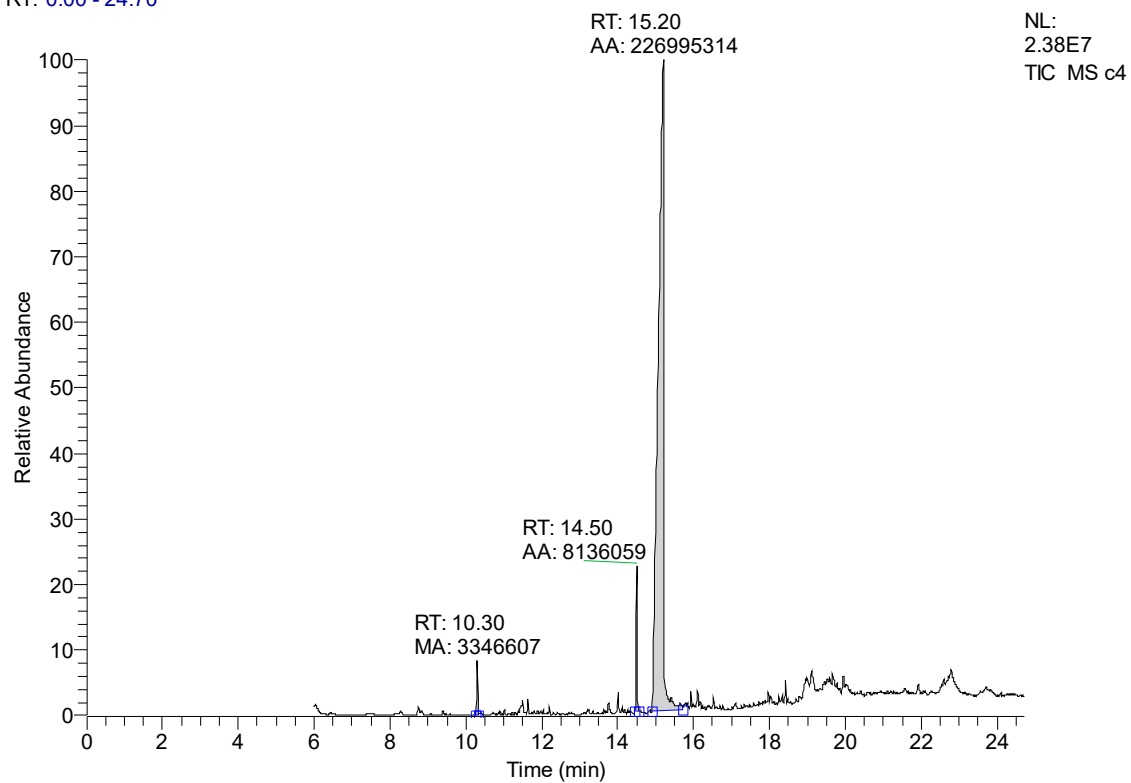

c4 #975 RT: 15.09 AV: 1 NL: 3.25E6  
T: + c Full ms [50.00-650.00]

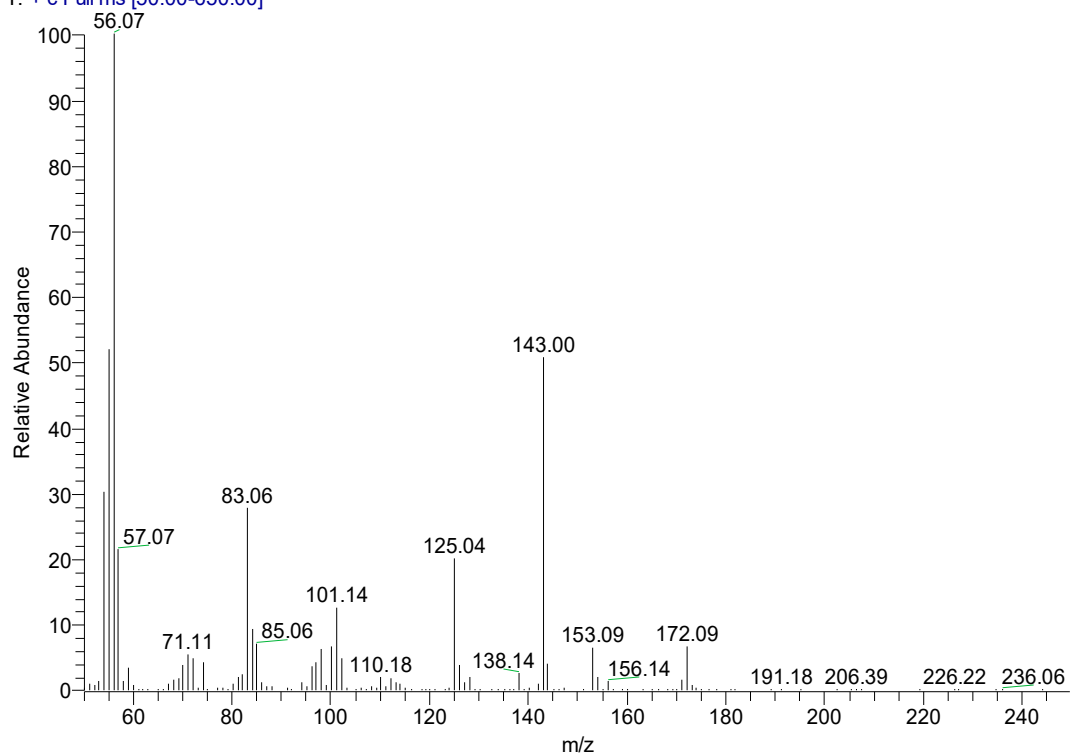

**b: C8-HSL**

$^1\text{H}$ -NMR (500 MHz,  $\text{CDCl}_3$ )  $\delta_{\text{H}}$ : 0.9 (3H, t,  $J = 6.5$  Hz,  $\text{CH}_3$ ), 1.21–1.43 (8H, m,  $(\text{CH}_2)_4\text{CH}_3$ ), 1.65–1.69 (2H, m,  $\text{CH}_2\text{CH}_2\text{CO}$ ), 2.15 (1H, m,  $\text{OCH}_2\text{CH}'\text{HCHNH}$ ), 2.24–2.28 (2H, m,  $\text{CH}_2\text{CH}_2\text{CO}$ ), 2.87 (1H, m,  $\text{OCH}_2\text{CH}'\text{HCHNH}$ ), 4.31 (1H, ddd,  $J = 11.0, 9.3, 6.1$  Hz,  $\text{OCH}'\text{HCH}_2\text{CHNH}$ ), 4.49 (1H, t, 9.0 Hz,  $\text{OCH}'\text{HCH}_2\text{CHNH}$ ), 4.58 (1H, ddd,  $J = 11.5, 8.5, 5.9$  Hz,  $\text{OCH}_2\text{CH}_2\text{CHNH}$ ), 6.1 (1H, s, NH);  $^{13}\text{C}$ -NMR (125 MHz,  $\text{CDCl}_3$ )  $\delta_{\text{C}}$ : 14.0 ( $\text{CH}_3$ ), 22.6 ( $\text{CH}_3\text{CH}_2$ ), 25.4 ( $\text{CH}_2(\text{CH}_2)_4\text{CO}$ ), 28.9 ( $\text{CH}_2(\text{CH}_2)_3\text{CO}$ ), 29.1 ( $\text{CH}_2(\text{CH}_2)_2\text{CO}$ ), 30.5 ( $\text{CH}_2\text{CH}_2\text{CO}$ ), 31.6 ( $\text{CH}_2\text{CH}_2\text{CO}$ ), 36.2 ( $\text{OCH}_2\text{CH}_2\text{CHNH}$ ), 49.2 ( $\text{OCH}_2\text{CH}_2\text{CHNH}$ ), 66.1 ( $\text{OCH}_2\text{CH}_2\text{CHNH}$ ), 173.7 (C=O amide), 175.6 (C=O lactone); MS(EI):  $m/z$  228, 198, 156, 143, 124, 101, 83.

**(1) NMR spectra**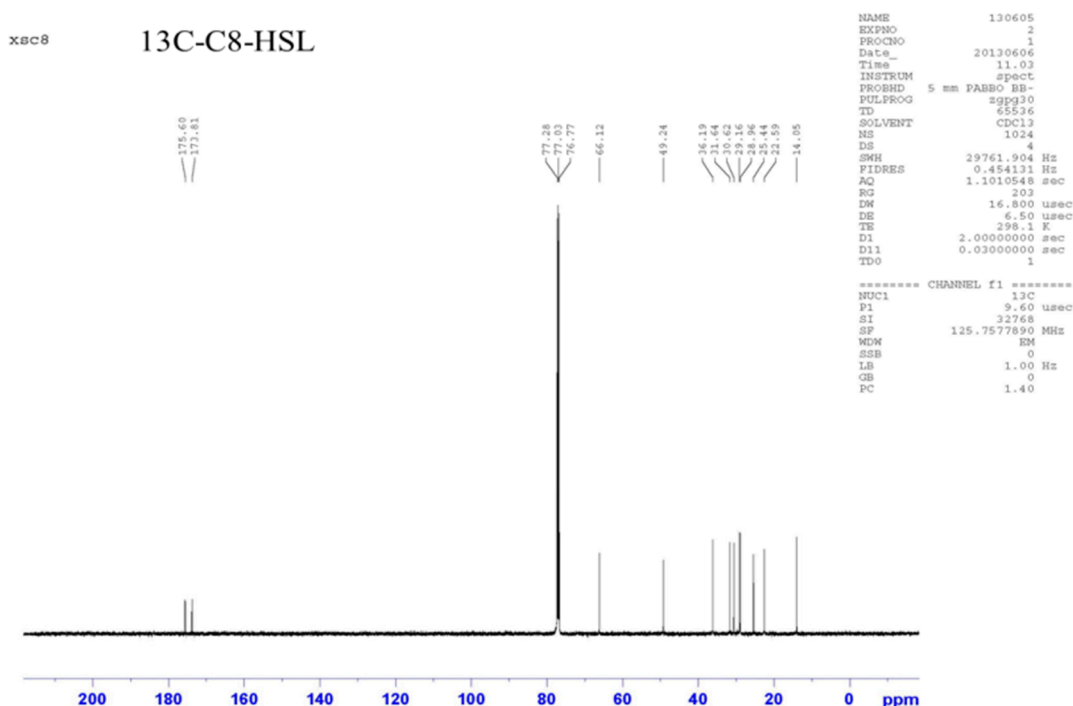

```
NAME                                130605
EXPNO                               1
PROCNO                              1
Date_                                20130606
Time_                                10.08
INSTRUM                             spect
PROBHD      5 mm PABBO BB-
PULPROG                             zgpg
TD                                         65536
SOLVENT                               CDCl3
NS                                   8
DS                                   0
AQ                                  10330.578 Hz
FIDRES                               0.157632 Hz
RG                                  3.1719923 sec
RG                                     101
FM                                   48.400 usec
DE                                   6.50 usec
TE                                   298.1 K
D1                                   1.0000000 sec
T1                                    .
TD0                                  1

***** CHANNEL f1 *****
NUC1          1H
P1            10.05 usec
SI           16384
SF           500.130000 MHz
WDW           EM
SSB           0
LB           0.30 Hz
GB           0
PC           1.00
```

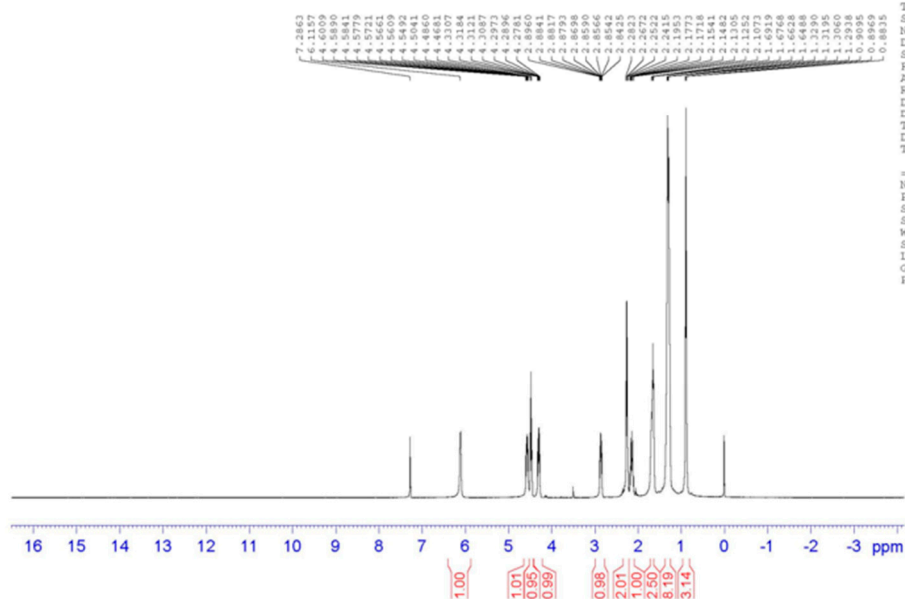

## RT: 0.00 - 28.04

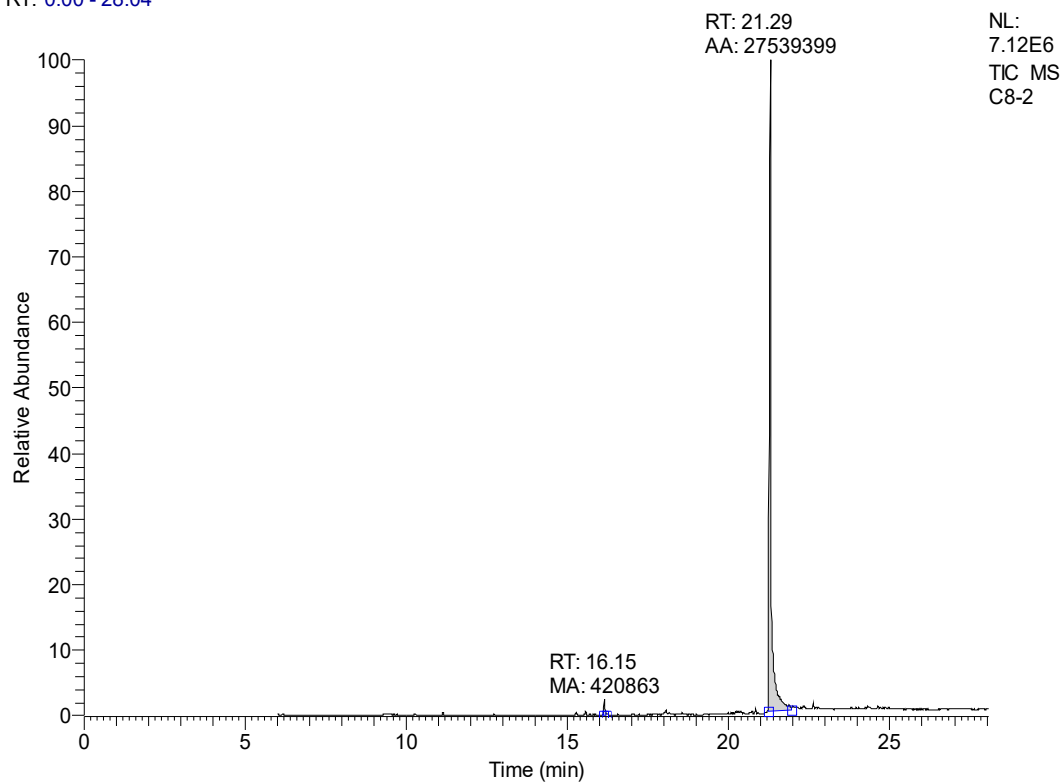

C8-2 #1538 RT: 21.28 AV: 1 NL: 7.36E5  
T: + c Full ms [50.00-650.00]

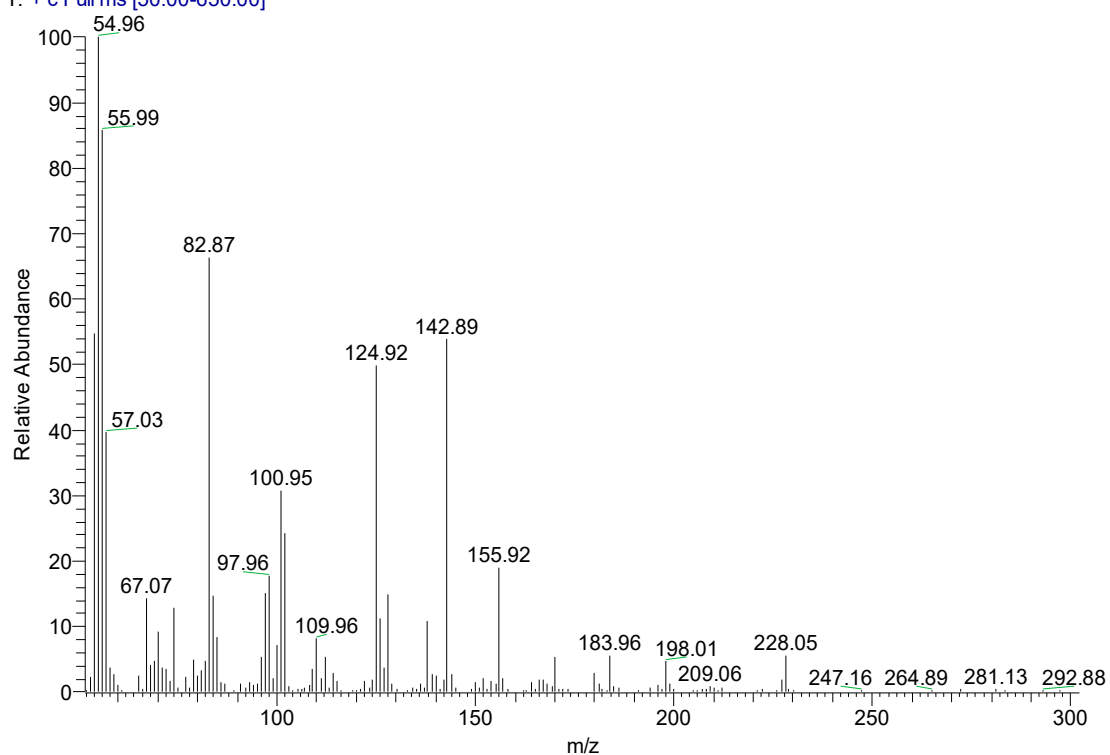



<sup>1</sup>H-NMR (500 MHz, CDCl<sub>3</sub>) δ<sub>H</sub>: 0.89 (3H, t, J = 7.0 Hz, CH<sub>3</sub>), 1.20–1.40 (16H, m, CH<sub>3</sub>(CH<sub>2</sub>)<sub>8</sub>), 1.60–1.69 (2H, m, CH<sub>2</sub>CH<sub>2</sub>CO), 2.15 (1H, m, OCH<sub>2</sub>CH'HCHNH), 2.27 (2H, m, CH<sub>2</sub>CH<sub>2</sub>CO), 2.87 (1H, m, OCH<sub>2</sub>CH'HCHNH), 4.30 (1H, ddd, J = 11.2, 9.3, 5.9 Hz, OCH'HCH<sub>2</sub>CHNH), 4.48 (1H, t, J = 9.1 Hz, OCH'HCH<sub>2</sub>CHNH), 4.58 (1H, ddd, J = 11.6, 8.6, 6.0 Hz, OCH<sub>2</sub>CH<sub>2</sub>CHNH), 6.15 (1H, s, NH); <sup>13</sup>C-NMR (125 MHz, CDCl<sub>3</sub>) δ<sub>C</sub>: 14.1 (CH<sub>3</sub>), 22.7 (CH<sub>2</sub>), 25.5 (CH<sub>2</sub>), 29.2 (CH<sub>2</sub>), 29.3 (CH<sub>2</sub>), 29.3 (CH<sub>2</sub>), 29.5 (CH<sub>2</sub>), 29.5 (CH<sub>2</sub>), 29.6 (CH<sub>2</sub>), 30.6 (CH<sub>2</sub>), 31.9 (CH<sub>2</sub>CH<sub>2</sub>CO), 36.2 (OCH<sub>2</sub>CH<sub>2</sub>CHNH), 49.2 (OCH<sub>2</sub>CH<sub>2</sub>CHNH), 66.1 (OCH<sub>2</sub>CH<sub>2</sub>CHNH), 173.8 (C=O amide), 175.63 (C=O lactone); MS(EI): *m/z* 284, 254, 240, 198, 170, 156, 143, 125, 102, 83, 57, 55.

xs-c12AHL

13C-12-HSL

| NAME    | 130508         |
|---------|----------------|
| EXPNO   | 8              |
| PROCNO  | 1              |
| Date_   | 20130509       |
| Time    | 2.46           |
| INSTRUM | spect          |
| PROBHD  | 5 mm PABBO BB- |
| PULPROG | zgpg30         |
| TD      | 65536          |
| SOLVENT | CDC13          |
| NS      | 1024           |
| DS      | 4              |
| SWH     | 29761.904 Hz   |
| FIDRES  | 0.454131 Hz    |
| AQ      | 1.1010548 sec  |
| RG      | 203            |
| DM      | 16.800 usec    |
| DE      | 6.50 usec      |
| TE      | 298.0 K        |
| D1      | 2.00000000 sec |
| D11     | 0.03000000 sec |
| TD0     | 1              |

===== CHANNEL f1 =====

|      |                 |
|------|-----------------|
| MUCL | 13C             |
| P1   | 9.60 usec       |
| SI   | 32768           |
| SF   | 125.7577890 MHz |
| WDW  | EM              |
| SSB  | 0               |
| LB   | 1.00 Hz         |
| GB   | 0               |
| PC   | 1.40            |

XS-C12AHL

1H-C12-HSL

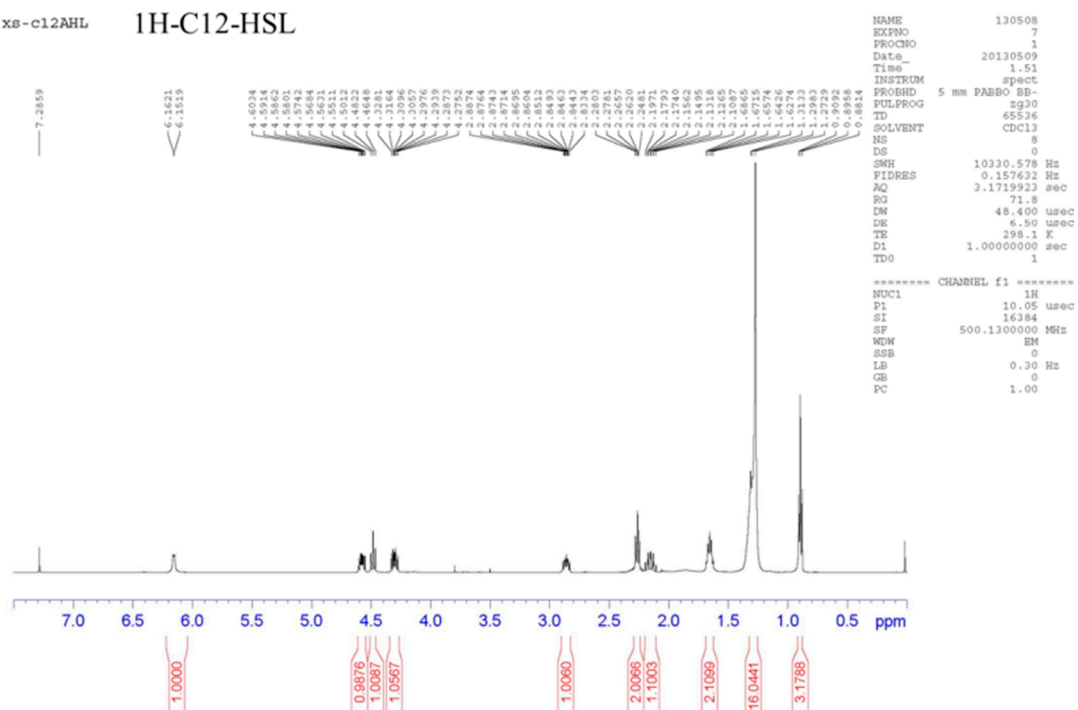

## (2) GC-MS spectra

RT: 0.00 - 28.01

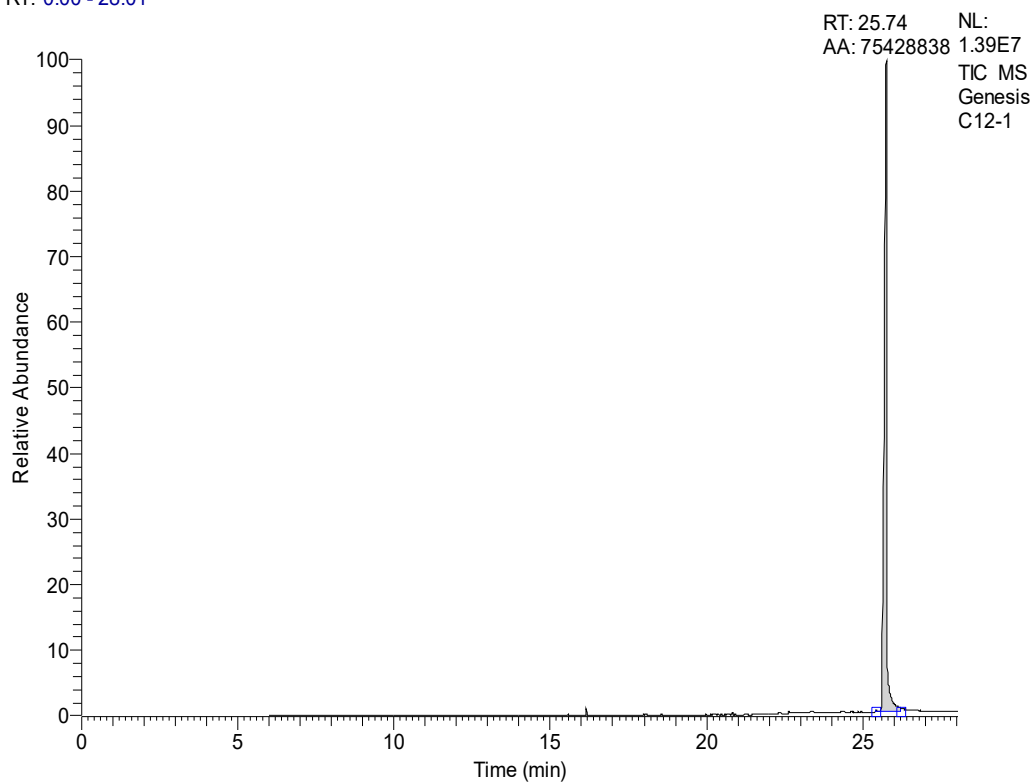

C12-1 #1979 RT: 25.73 AV: 1 NL: 1.46E6  
T: +c Full ms [50.00-650.00]

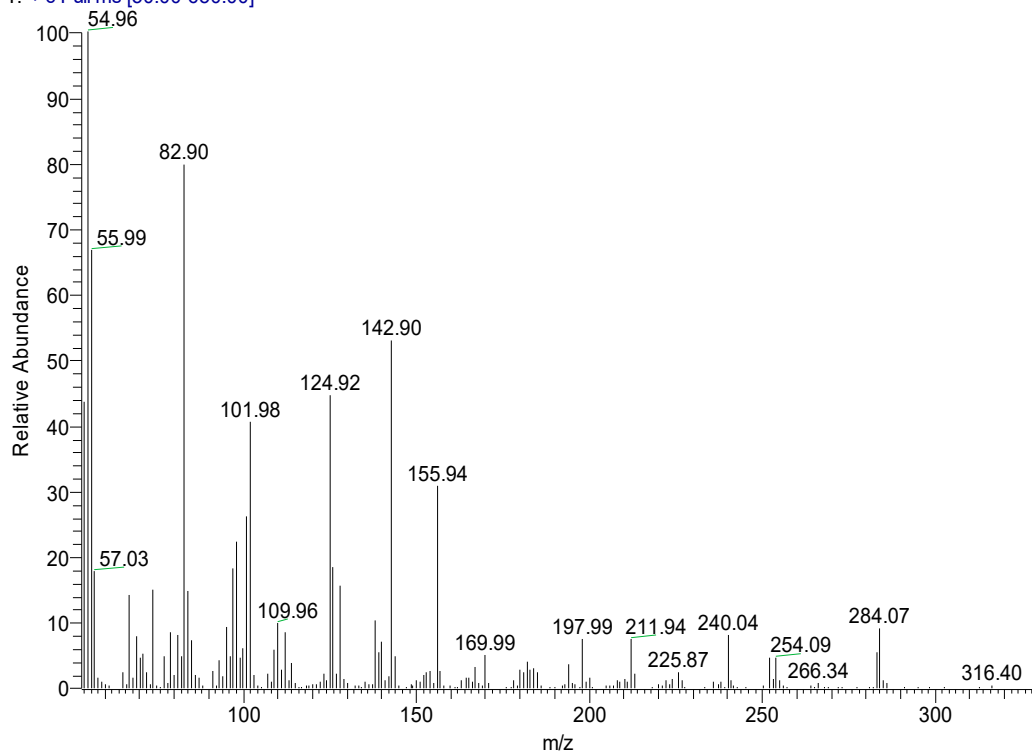

Supplement: s1 [file s1]
